# Supplementary material
Source: PubMed Central journal article supplement (PMC8884209)
Supplement: boe-13-2-1102-s001.pdf [file boe-13-2-1102-s001.pdf]

## Versatile, do-it-yourself, low-cost spinning disk confocal microscope: supplement

**AARON R. HALPERN,<sup>1,4</sup>  MIN YEN LEE,<sup>1</sup>  MARCO D. HOWARD,<sup>1</sup>  
MARCUS A. WOODWORTH,<sup>1</sup> PHILIP R. NICOVICH,<sup>2</sup> AND JOSHUA C.  
VAUGHAN<sup>1,3,5</sup>**

<sup>1</sup>University of Washington, Department of Chemistry, Seattle, WA 98195, USA

<sup>2</sup>Allen Institute for Brain Science, Seattle, WA 98195, USA

<sup>3</sup>University of Washington, Department of Physiology and Biophysics, Seattle, WA 98195, USA

<sup>4</sup>aaron.halpern@gmail.com

<sup>5</sup>jcv2@uw.edu

---

This supplement published with Optica Publishing Group on 1 February 2022 by The Authors under the terms of the [Creative Commons Attribution 4.0 License](https://creativecommons.org/licenses/by/4.0/) in the format provided by the authors and unedited. Further distribution of this work must maintain attribution to the author(s) and the published article's title, journal citation, and DOI.

Supplement DOI: <https://doi.org/10.6084/m9.figshare.18711923>

Parent Article DOI: <https://doi.org/10.1364/BOE.442087>

# Versatile, do-it-yourself, low-cost spinning disk confocal microscope: Supplemental Document

**Table S1. Component list for DIY spinning disk confocal microscope.** The components below are meant to be incorporated onto an existing microscope system including chassis, camera, and lasers, which depending on configuration may cost from \$100,000-\$200,000 (see also Supplemental Note 3).

| Component Name                                                               | Vendor                   | Catalog #                        | Quan. | Price (\$)         | Total (\$)     |
|------------------------------------------------------------------------------|--------------------------|----------------------------------|-------|--------------------|----------------|
| <b>Lens</b>                                                                  |                          |                                  |       |                    |                |
| f=50 mm Achromatic Doublet                                                   | Thorlabs                 | AC254-050-A-ML                   | 1     | 106.05             | 106.05         |
| f=100 mm Achromatic Doublet                                                  | Thorlabs                 | AC254-100-A-ML                   | 1     | 106.05             | 106.05         |
| f=150 mm Achromatic Doublet                                                  | Thorlabs                 | AC254-150-A-ML                   | 3     | 106.05             | 318.15         |
| <b>Optomechanics</b>                                                         |                          |                                  |       |                    |                |
| 30 mm Cage Cube with Dichroic Filter Mount                                   | Thorlabs                 | CM1-DCH                          | 1     | 175.31             | 175.31         |
| Kinematic Prism Mount                                                        | Thorlabs                 | KM100PM                          | 1     | 80.07              | 80.07          |
| Mounted Standard Iris                                                        | Thorlabs                 | ID25                             | 1     | 60.87              | 60.87          |
| Precision Optical Rail                                                       | Newport                  | PRL-6                            | 1     | 165                | 165            |
| Rail Carrier PRL Series                                                      | Newport                  | PRC-3                            | 1     | 107                | 107            |
| <b>Filters, Dichroics and Wheel</b>                                          |                          |                                  |       |                    |                |
| Laser polychroic mirror                                                      | Chroma                   | zt405/488/561/647/<br>752rpc-UF2 | 1     | 975                | 975            |
| Emission Filter ET445/58m                                                    | Chroma                   | ET445/58m                        | 1     | 325                | 325            |
| Emission Filter ET525/50m                                                    | Chroma                   | ET525/50m                        | 1     | 325                | 325            |
| Emission Filter ET605/70m                                                    | Chroma                   | ET605/70m                        | 1     | 325                | 325            |
| Emission Filter ET700/75                                                     | Chroma                   | ET700/75                         | 1     | 325                | 325            |
| Emission Filter ET800/60                                                     | Chroma                   | ET800/60                         | 1     | 325                | 325            |
| Motorized Filter Wheels                                                      | Thorlabs                 | FW102C                           | 1     | 1211.97            | 1211.97        |
| <b>Mirrors</b>                                                               |                          |                                  |       |                    |                |
| Broadband Dielectric Mirror                                                  | Thorlabs                 | BB1-E02                          | 5     | 77.35              | 386.75         |
| <b>Beam Shaper</b>                                                           |                          |                                  |       |                    |                |
| Topag top hat beam shaper, 250mm WD<br>4x4mm top hat 400-700nm AR/AR         | CourierTronics           | GTH-5-25-4                       | 1     | 668                | 668            |
| Topag positioner for GTH-5-25-4                                              | CourierTronics           | HSF01                            | 1     | 176                | 176            |
| <b>Photomask for Spinning Disk</b>                                           |                          |                                  |       |                    |                |
| 5X5X.090 Quartz ND5 10um Resolution, cut<br>and center hole, both sides BBAR | Front Range<br>Photomask | NA                               | 1     | 974                | 974            |
| <b>Fasteners and Miscellaneous</b>                                           |                          |                                  |       |                    |                |
| Screw 2-56 Thread Size, 3/8"                                                 | McMaster                 | 91253A079                        | 1     | 6.09               | 6.09           |
| O-Ring Dash Number 016                                                       | McMaster                 | 9452K6                           | 1     | 4.46               | 4.46           |
| O-Ring Dash Number 022                                                       | McMaster                 | 9452K76                          | 1     | 5.93               | 5.93           |
| Yeeco 5-12V BLDC motor controller                                            | Amazon                   | B07BQYYDPH                       | 1     | 12.99              | 12.99          |
|                                                                              |                          |                                  |       | <b>Grand Total</b> | <b>7164.69</b> |

**Alternative or Optional Components**

|                                                                  |                          |                          |   |       |       |
|------------------------------------------------------------------|--------------------------|--------------------------|---|-------|-------|
| 5x5x.090 LRC Chrome 10um Resolution Mask,<br>cut and center hole | Front Range<br>Photomask | NA                       | 1 | 392   | 392   |
| Laser polychroic mirror                                          | Chroma                   | ZT405/488/561/647<br>rpc | 1 | 550   | 550   |
| Bandpass Emission Filter                                         | Chroma                   | ET605/70m-2p             | 1 | 475   | 475   |
| Bandpass Emission Filter                                         | Chroma                   | ET525/50m-2p             | 1 | 475   | 475   |
| Externally SM1-Threaded End Cap                                  | Thorlabs                 | SM1PL                    | 2 | 15.48 | 30.96 |
| Externally SM1-Threaded Plug                                     | Thorlabs                 | SM1CP2                   | 2 | 18.83 | 37.66 |

**Table S2. Summary of sample preparation and imaging conditions.**

| Figure      | Specimen                                      | 1° Ab (1-2 µg/mL) or FISH                   | 2° Ab (2-5 µg/mL or as indicated) or FISH                                                                                       | Additional Stains                                     | Imaging Cocktail                                                                | Objective lens                                                              | Disk Sector                                                                        | Illumination & Area                                           | Intensity at sample, exposures, Z-step size                                                                                                                                    |
|-------------|-----------------------------------------------|---------------------------------------------|---------------------------------------------------------------------------------------------------------------------------------|-------------------------------------------------------|---------------------------------------------------------------------------------|-----------------------------------------------------------------------------|------------------------------------------------------------------------------------|---------------------------------------------------------------|--------------------------------------------------------------------------------------------------------------------------------------------------------------------------------|
| 3 a-d       | Beads (fluoresbrite YG 0.1 µm)                |                                             |                                                                                                                                 |                                                       |                                                                                 | 100× 1.45 NA oil (n = 1.512)                                                | 3                                                                                  | 2× expand 80×80 µm <sup>2</sup>                               | 488 nm: 18 W/cm <sup>2</sup><br>133 ms exposures                                                                                                                               |
| 3 f-g       | 1M fluorescein solution                       |                                             |                                                                                                                                 |                                                       |                                                                                 | 100× 1.45 NA oil (n = 1.512)                                                | prototype disk<br><i>d</i> = 50 µm<br><i>s</i> = 250 µm<br>or<br><i>s</i> = 500 µm |                                                               |                                                                                                                                                                                |
| 4 a-f       | BS-C-1 cells, extracted then PFA/GA fixed     | Rat x tTub<br>Rb x dTub<br>Ms x Vim         | D x Rat AF750 (3.5 d/p)<br>D x Rb AF568 (7.5 d/p)<br>D x Ms AT488 (6 d/p)                                                       | Phalloidin AF647 0.6 µM, Hoechst 2 µg/mL in PBS       | Glox + 1 mM trolox                                                              | 60× 1.27 NA water                                                           | 3                                                                                  | 2× expand 130×130 µm <sup>2</sup>                             | 405: 2 W/cm <sup>2</sup><br>488: 7 W/cm <sup>2</sup><br>561: 6 W/cm <sup>2</sup><br>647: 4 W/cm <sup>2</sup><br>750: 7 W/cm <sup>2</sup><br>266 ms exposures<br>250 nm z-steps |
| 4 g-i       | RPE-1 cells, PFA fixed                        | GAPDH probe set, 150 nM, overnight 37 °C    | Sequence P5 AT565 reporter oligo, 20 nM in 2× SSC                                                                               | TO-PRO-3 1 µM                                         | 0.02× SSC (3× expansion)                                                        | 60× 1.27 NA water                                                           | 5                                                                                  | 2× expand 130×130 µm <sup>2</sup>                             | 561: 32 W/cm <sup>2</sup><br>647: 2 W/cm <sup>2</sup><br>266 ms exposures<br>250 nm z-steps                                                                                    |
| 4 j-k       | Perfusion PFA fixed mouse brain, 100 µm slice | Rb x Homer<br>Ms x Bassoon<br>Rat x mCherry | D x Rb AF488 (8.5 d/p)<br>D x Ms AT647N (3.5 d/p)<br>D x Rat AT565 (3.8 d/p)                                                    |                                                       | water (4× expansion)                                                            | 60× 1.27 NA water                                                           | 5                                                                                  | 2× expand 130×130 µm <sup>2</sup>                             | 488: 5 W/cm <sup>2</sup><br>561: 10 W/cm <sup>2</sup><br>647: 7 W/cm <sup>2</sup><br>266 ms exposures<br>500 nm-z steps                                                        |
| 5 a-c       | RPE-1 cells, extracted then PFA/GA fixed      | Rat x Tub                                   | D x Rat Biotin (2 µg/mL)<br>D x Rat AT488 (7 d/p, 0.2 µg/mL)                                                                    | streptavidin 5 µg/mL, then sequence P1C biotin 500 nM | PAINT imaging buffer<br>Sequence P1 Cy3B<br>0.05 nM                             | 100× 1.45 NA oil                                                            | 2                                                                                  | None<br>40×40 µm <sup>2</sup>                                 | 488: 10 W/cm <sup>2</sup><br>561: 135 W/cm <sup>2</sup><br>106 ms exposures                                                                                                    |
| 5 f-g       | B-SC-1 cells, extracted, then PFA/GA fixed    | Rat x Tub                                   | D x Rat AF647 (4.6 d/p)                                                                                                         |                                                       | Glox + 143 mM βME                                                               | 100× 1.45 NA oil                                                            | prototype disk<br><i>d</i> = 70 µm<br><i>s</i> = 350 µm                            | 2× contract 20×20 µm <sup>2</sup>                             | 647: 1 kW/cm <sup>2</sup><br>66 ms exposures                                                                                                                                   |
| 5 h,i       | PtK-1 cells, extracted, then PFA/GA fixed     | Rat x Tub<br>Ms x Tub                       | D x Rat AF647 (4.6 d/p)<br>D x Ms AF647 (5.3 d/p)                                                                               |                                                       | Glox + 143 mM βME                                                               | 100× 1.45 NA oil                                                            | 2                                                                                  | 2× contract 20×20 µm <sup>2</sup>                             | 647: 1.2 kW/cm <sup>2</sup><br>26 ms exposures                                                                                                                                 |
| S3, Table 2 | Beads (Tetraspeck 0.1 µm or 0.2 µm)           |                                             |                                                                                                                                 |                                                       | Optical cement<br>Water<br>Air<br>Air                                           | 100× 1.45 NA oil<br>60× 1.27 NA water<br>100× 0.9 NA air<br>20× 0.45 NA air | Various sectors                                                                    | 2× expand 80×80 µm <sup>2</sup>                               | all: ~20 W/cm <sup>2</sup><br>266 ms exposures                                                                                                                                 |
| S4, Table 2 | BS-C-1 cells, extracted, then PFA/GA fixed    | Rat x Tub                                   | D x Rat AF405 (2 d/p)<br>D x Rat AT488 (7 d/p)<br>D x Rat AF568 (3.4 d/p)<br>D x Rat AF647 (4.6 d/p)<br>D x Rat AF750 (3.5 d/p) |                                                       | Glox + 1 mM trolox or<br>Glox + 1 mM trolox +<br>60% sucrose for<br>oil imaging | 100× 1.45 NA oil<br>60x 1.27 NA water<br>100x 0.9 NA air<br>20x 0.45 NA air | Various sectors                                                                    | 2× expand 80×80 µm <sup>2</sup> or<br>130×130 µm <sup>2</sup> | all: ~10 W/cm <sup>2</sup><br>266 ms exposures                                                                                                                                 |

**Abbreviations:** 1° Ab = primary antibody; 2° Ab = secondary antibody; AF = Alexa Fluor; AT = ATTO-TEC; *d* = disk pinhole diameter; d/p = average number of dye molecules per protein; D x Rat = donkey anti-rat IgG; D x Rb = donkey anti-rabbit IgG; D x Ms = donkey anti-mouse IgG; GA = glutaraldehyde; Glox = glucose oxidase and catalase mixture; NA = numerical aperture; PBS = phosphate buffered saline; PFA = paraformaldehyde; *s* = inter-spiral spacing; SSC = saline sodium citrate; tTub = tyrosinated tubulin; dTub = detyrosinated tubulin; Vim = vimentin.

**Notes:** Illumination intensities are reported as average intensity across the field of view.

**Table S3. DNA sequences for GAPDH mRNA FISH and DNA PAINT.**

| <b>GAPDH Probes</b>   | <b>Sequence</b>                                        |
|-----------------------|--------------------------------------------------------|
| GAPDH_P01             | GGGTGGAATCATATTGGAACATGTAAACCATGTTAATGATACGGCGACCACCGA |
| GAPDH_P02             | AGCCAAATTCGTTGTCATACCAGGAAATGAGCTTAATGATACGGCGACCACCGA |
| GAPDH_P03             | TGGTGATGGGATTTCCATTGATGACAAGCTTCTTAATGATACGGCGACCACCGA |
| GAPDH_P04             | TTTACCAGAGTAAAAGCAGCCCTGGTGACTTAATGATACGGCGACCACCGA    |
| GAPDH_P05             | TTTATTGATGGTACATGACAAGGTGCGGCTCCTTAATGATACGGCGACCACCGA |
| GAPDH_P06             | CAAAAGAAGATGCGGCTGACTGTCGAATTAATGATACGGCGACCACCGA      |
| GAPDH_P07             | TTCAAGGGGTCTACATGGCAACTGTGATTAATGATACGGCGACCACCGA      |
| GAPDH_P08             | TTCTCATGGTTCACACCCATGACGAACATGGTTAATGATACGGCGACCACCGA  |
| GAPDH_P09             | GGCATTGCTGATGATCTTGAGGCTGTTGTCTTAATGATACGGCGACCACCGA   |
| GAPDH_P10             | ACGCCTGCTCACCACCTTCTTGATGTCATCATTAAATGATACGGCGACCACCGA |
| GAPDH_P11             | TCTCAGCCTTGACGGTGCCATGGAATTTGTTAATGATACGGCGACCACCGA    |
| GAPDH_P12             | ACTTGATTTTGGAGGGATCTCGCTCCTGGTTAATGATACGGCGACCACCGA    |
| GAPDH_P13             | GGACTGTGGTCATGAGTCCCTCCACGATATTAATGATACGGCGACCACCGA    |
| GAPDH_P14             | CAAAGTGGTCGTTGAGGGCAATGCCATTAATGATACGGCGACCACCGA       |
| GAPDH_P15             | AGTTGTCATGGATGACCTTGCCAGGTTAATGATACGGCGACCACCGA        |
| GAPDH_P16             | CAGTAGAGGCAGGGATGATGTTCTGGTTAATGATACGGCGACCACCGA       |
| GAPDH_P17             | TCGCTGTTGAAGTCAGAGGAGACCACTTAATGATACGGCGACCACCGA       |
| GAPDH_P18             | GACCAAATCCGTTGACTCCGACCTTCACCTTAATGATACGGCGACCACCGA    |
| GAPDH_P19             | TTCTCCATGGTGGTGAAGACGCCAGTGTTAATGATACGGCGACCACCGA      |
| GAPDH_P20             | GTCTTACTCCTTGAGGCCATGTGGGTTAATGATACGGCGACCACCGA        |
| GAPDH_P21             | CCACAGTCTTCTGGGTGGCAGTGATGTTAATGATACGGCGACCACCGA       |
| GAPDH_P22             | G TTCAGCTCAGGGATGACCTTGCCATTAATGATACGGCGACCACCGA       |
| GAPDH_P23             | CAGGTCAGGTCCACCACTGACACGTTTTAATGATACGGCGACCACCGA       |
| GAPDH_P24             | CTCAGTGTAGCCCAGGATGCCCTTGATTAATGATACGGCGACCACCGA       |
|                       |                                                        |
| <b>GAPDH Reporter</b> | ATTO565-CTGTAGCAGTTCGGTGGTCGCCGTATCATT                 |
|                       |                                                        |
| <b>DNA PAINT</b>      |                                                        |
| P1C (docking)         | Biotin-TTTTTATACATCTA                                  |
| P1 (imaging)          | CTAGATGTAT-Cy3B                                        |

**Table S4. Summary of Point Spread Functions for different disk and objective combinations.**

| Pinhole Dia ( $\mu\text{m}$ ) | $\lambda_{\text{ex}}$ | X-FWHM ( $\mu\text{m}$ ) | stdX-FWHM | Z-FWHM ( $\mu\text{m}$ ) | stdZ-FWHM | Sample |
|-------------------------------|-----------------------|--------------------------|-----------|--------------------------|-----------|--------|
| <b>20× 0.45 NA Air</b>        |                       |                          |           |                          |           |        |
| 35                            | 488                   | 0.80                     | 0.06      | 4.89                     | 0.19      | TS200  |
| 35                            | 561                   | 0.84                     | 0.05      | 4.95                     | 0.11      | "      |
| 35                            | 647                   | 0.85                     | 0.03      | 5.38                     | 0.07      | "      |
| 50                            | 488                   | 0.75                     | 0.03      | 4.72                     | 0.20      | "      |
| 50                            | 561                   | 0.80                     | 0.02      | 5.32                     | 0.21      | "      |
| 50                            | 647                   | 0.88                     | 0.01      | 6.23                     | 0.17      | "      |
| <b>100× 0.9 NA Air</b>        |                       |                          |           |                          |           |        |
| 35                            | 488                   | 0.298                    | 0.008     | 0.69                     | 0.01      | TS100  |
| 35                            | 561                   | 0.325                    | 0.009     | 0.78                     | 0.02      | "      |
| 35                            | 647                   | 0.370                    | 0.008     | 0.89                     | 0.04      | "      |
| 50                            | 488                   | 0.317                    | 0.010     | 0.74                     | 0.01      | "      |
| 50                            | 561                   | 0.334                    | 0.007     | 0.81                     | 0.01      | "      |
| 50                            | 647                   | 0.386                    | 0.008     | 0.93                     | 0.02      | "      |
| <b>60× 1.27 NA Water</b>      |                       |                          |           |                          |           |        |
| 35                            | 488                   | 0.32                     | 0.01      | 0.77                     | 0.04      | TS100  |
| 35                            | 561                   | 0.34                     | 0.02      | 0.74                     | 0.03      | "      |
| 35                            | 647                   | 0.337                    | 0.008     | 0.72                     | 0.01      | "      |
| 50                            | 405                   | 0.30                     | 0.05      | 1.37                     | 0.08      | "      |
| 50                            | 488                   | 0.308                    | 0.008     | 0.82                     | 0.04      | "      |
| 50                            | 561                   | 0.33                     | 0.01      | 0.83                     | 0.04      | "      |
| 50                            | 647                   | 0.353                    | 0.005     | 0.85                     | 0.02      | "      |
| 50                            | 750                   | 0.44                     | 0.03      | 1.04                     | 0.05      | "      |
| <b>100× 1.45 NA Oil</b>       |                       |                          |           |                          |           |        |
| 20*                           | 488                   | 0.24                     | 0.02      | 0.40                     | 0.01      | TS100  |
| 20*                           | 561                   | 0.25                     | 0.02      | 0.40                     | 0.02      | "      |
| 20*                           | 647                   | 0.25                     | 0.02      | 0.47                     | 0.04      | "      |
| 30*                           | 488                   | 0.22                     | 0.01      | 0.42                     | 0.01      | "      |
| 30*                           | 561                   | 0.23                     | 0.01      | 0.41                     | 0.01      | "      |
| 30*                           | 647                   | 0.250                    | 0.008     | 0.48                     | 0.02      | "      |
| 35                            | 488                   | 0.207                    | 0.005     | 0.42                     | 0.01      | "      |
| 35                            | 561                   | 0.225                    | 0.005     | 0.42                     | 0.01      | "      |
| 35                            | 647                   | 0.270                    | 0.006     | 0.49                     | 0.02      | "      |
| 40*                           | 488                   | 0.224                    | 0.007     | 0.45                     | 0.01      | "      |
| 40*                           | 561                   | 0.236                    | 0.009     | 0.45                     | 0.01      | "      |
| 40*                           | 647                   | 0.260                    | 0.007     | 0.51                     | 0.02      | "      |
| 50                            | 405                   | 0.22                     | 0.01      | 0.96                     | 0.16      | MT     |
| 50                            | 488                   | 0.222                    | 0.004     | 0.49                     | 0.02      | TS100  |
| 50                            | 561                   | 0.237                    | 0.003     | 0.50                     | 0.02      | "      |
| 50                            | 647                   | 0.273                    | 0.003     | 0.56                     | 0.02      | "      |
| 50                            | 750                   | 0.35                     | 0.02      | 0.61                     | 0.03      | MT     |
| 70*                           | 488                   | 0.229                    | 0.001     | 0.51                     | 0.01      | "      |
| 70*                           | 561                   | 0.244                    | 0.005     | 0.52                     | 0.01      | "      |
| 70*                           | 647                   | 0.276                    | 0.004     | 0.60                     | 0.01      | "      |

**Notes:**

- 1) X-FWHM and stdX-FWHM refer to the average lateral full-width at half maximum from Gaussian fits and the standard deviation from many such fits. Z-FWHM and stdZ-FWHM refer to the average axial full-width at half maximum from Gaussian fits and the standard deviation from many such fits.
- 2) Point spread function widths were determined from either 100 nm Tetraspeck beads (TS100), 200 nm Tetraspeck beads (TS200), or microtubule samples (MT).
- 3) \* denotes a disk without an anti-reflection coating.
- 4) The inter-spiral spacing for all sectors was equal to 5x the pinhole diameter.

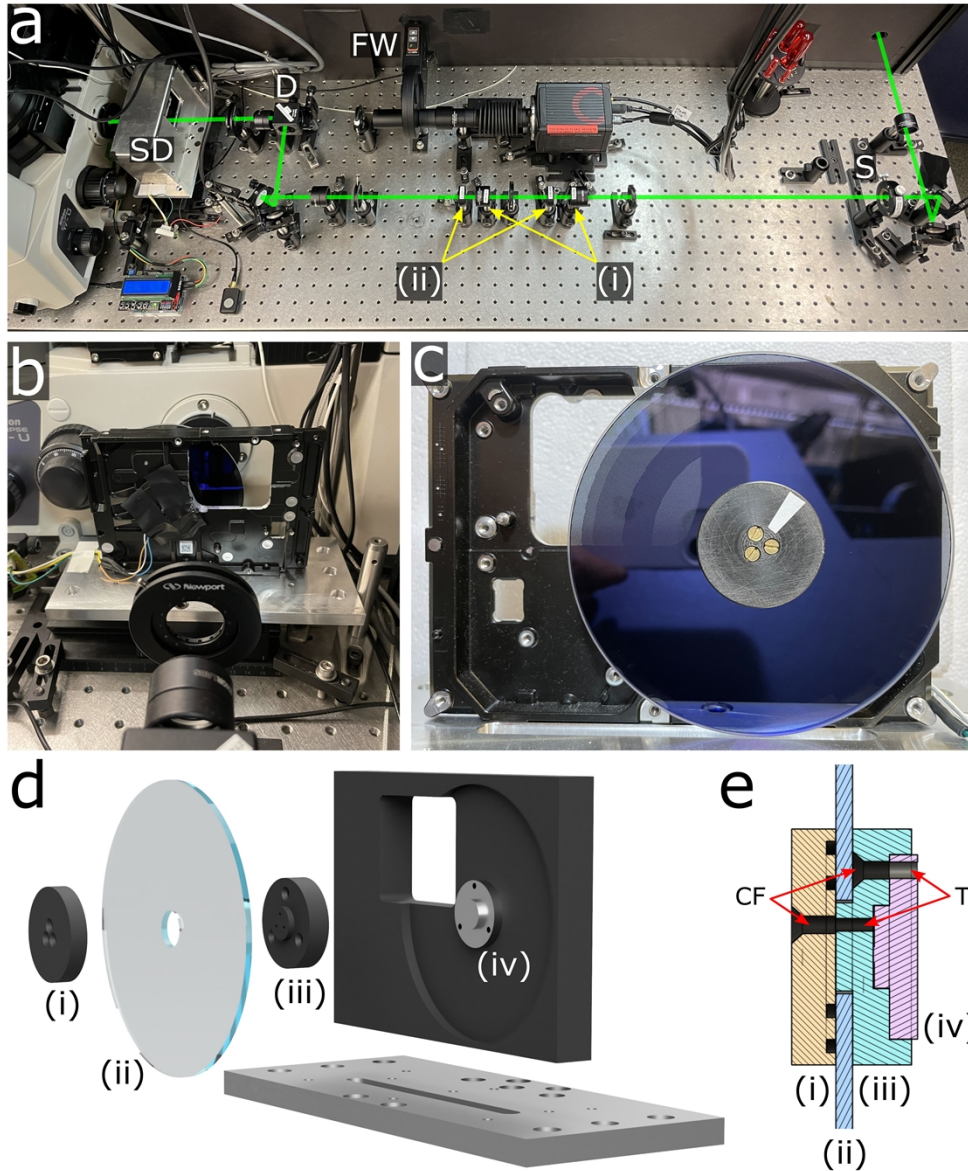

**Figure S1.** DIY SDCM setup and schematic diagrams. (a) Photograph of DIY SDCM with selected components highlighted: Spinning disk (SD) in its protective housing, dichroic (D), filter wheel (FW) and square shaper (S). The excitation laser path is highlighted in green, with 2× expanding telescope lenses (i) for general illumination, or 2× demagnifying telescope lenses for high power density (STORM illumination) by reversing the lens order in the marked optical mounts (ii). Alternatively, the telescope lenses can be omitted and the shaper repositioned for no magnification (DNA-PAINT illumination). (b) Photograph of spinning disk with housing removed. The commercial hard drive motor-base assembly is modified to include a machined window for the light path. (c) Photograph of the spinning disk showing the Delrin adapter and white tape mark used to trigger the tachometer circuit. (d) Schematic diagram and (e) cross-sectional view of spinning disk components and assembly. Marked components in (d) and (e) include (i) Delrin clamping plate, (ii) glass photomask, (iii) Delrin motor adapter, and (iv) hard drive spindle motor. Clearance and threaded holes are denoted CF and T, respectively. Note the O-ring grooves in the clamping plate ensure a strong grasp on the glass disk (see **Table S1** for part numbers). Refer to Code 3 for CAD files.[1]

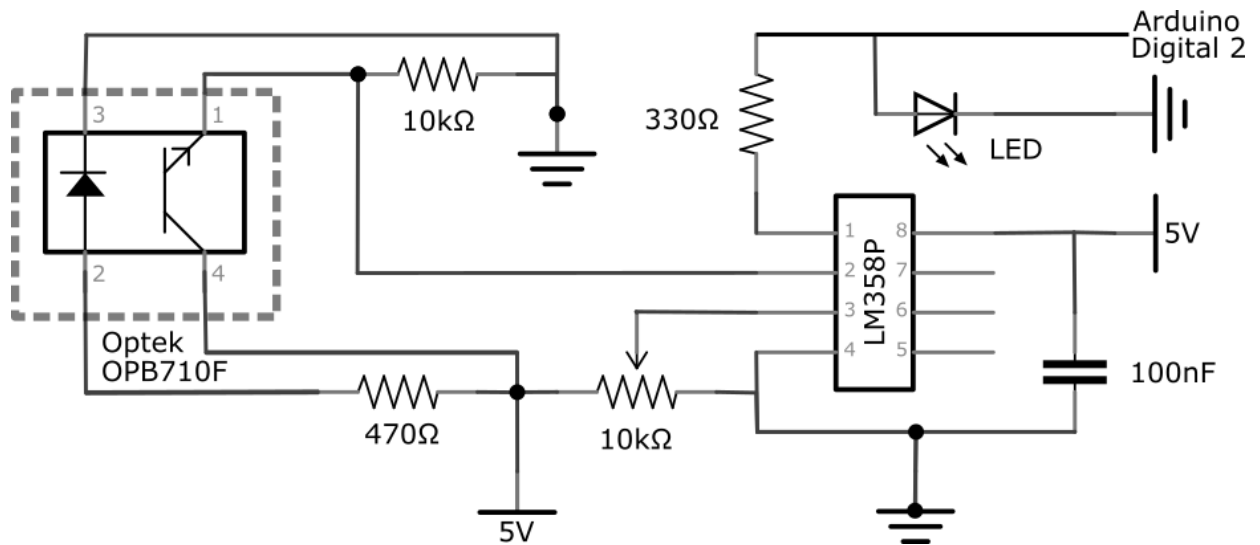

**Figure S2.** Circuit schematic of spinning disk tachometer. A reflective phototransistor photodiode pair (Optek, OPB710F, 910 nm) was fitted into the spinning disk housing above the Delrin clamping plate, and a small strip of absorptive tape placed applied to provide a reflective signal difference. The detection threshold of the operational amplifier (LM358P) was adjusted using the potentiometer, and a LED provided a visual readout. The digital output signal of the circuit was wired to a microcontroller (Arduino Uno) which counted the pulses in a predetermined time window, and the rotation rate was displayed on an LCD shield (DFRobot, DFR0009). The reflective sensor (dashed box) was connected on long flexible wires for ease of placement. Practically, we found it was unnecessary to trigger the camera from the disk rotation signal, instead setting an exposure time approximately equal to an integer number of disk rotations was sufficient to avoid any streaking artifacts. Refer to Code 4 for corresponding Arduino code.[2]



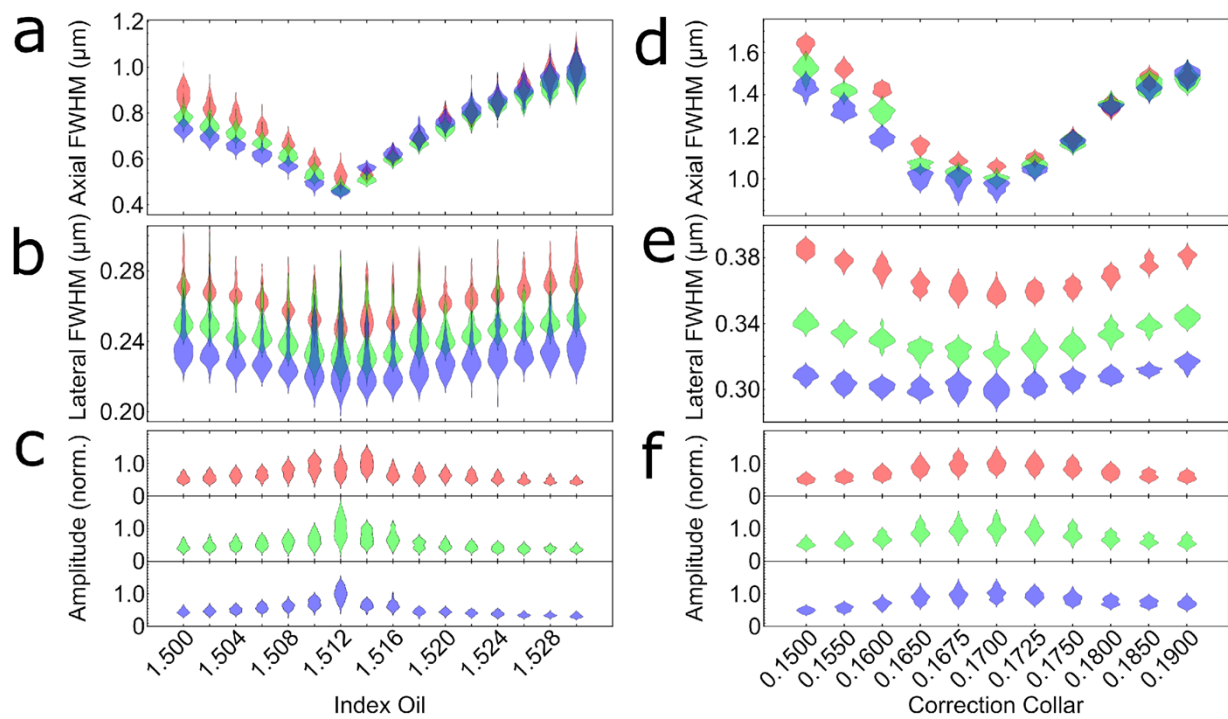

**Figure S3.** PSF axial FWHM, lateral FWHM, and maximum amplitude by varying index matching oil of a  $100\times 1.45\text{NA}$  oil immersion objective (a-c), or by varying the correction collar of a  $60\times 1.27\text{NA}$  water immersion objective (d-f), respectively. The analysis was performed on 100 nm Tetraspeck beads excited at 488 nm (blue), 561 nm (green) and 647 nm (red) using  $d = 50 \mu\text{m}$  and  $s = 250 \mu\text{m}$ . For the oil lens (a-c), the beads were adsorbed to a coverglass and embedded in optical cement (Nordland NOA60), and  $>90$  beads were analyzed for each index oil. For the water lens (d-f), the beads were adsorbed to a coverglass, covered with water, and  $>60$  beads were imaged for each collar position.

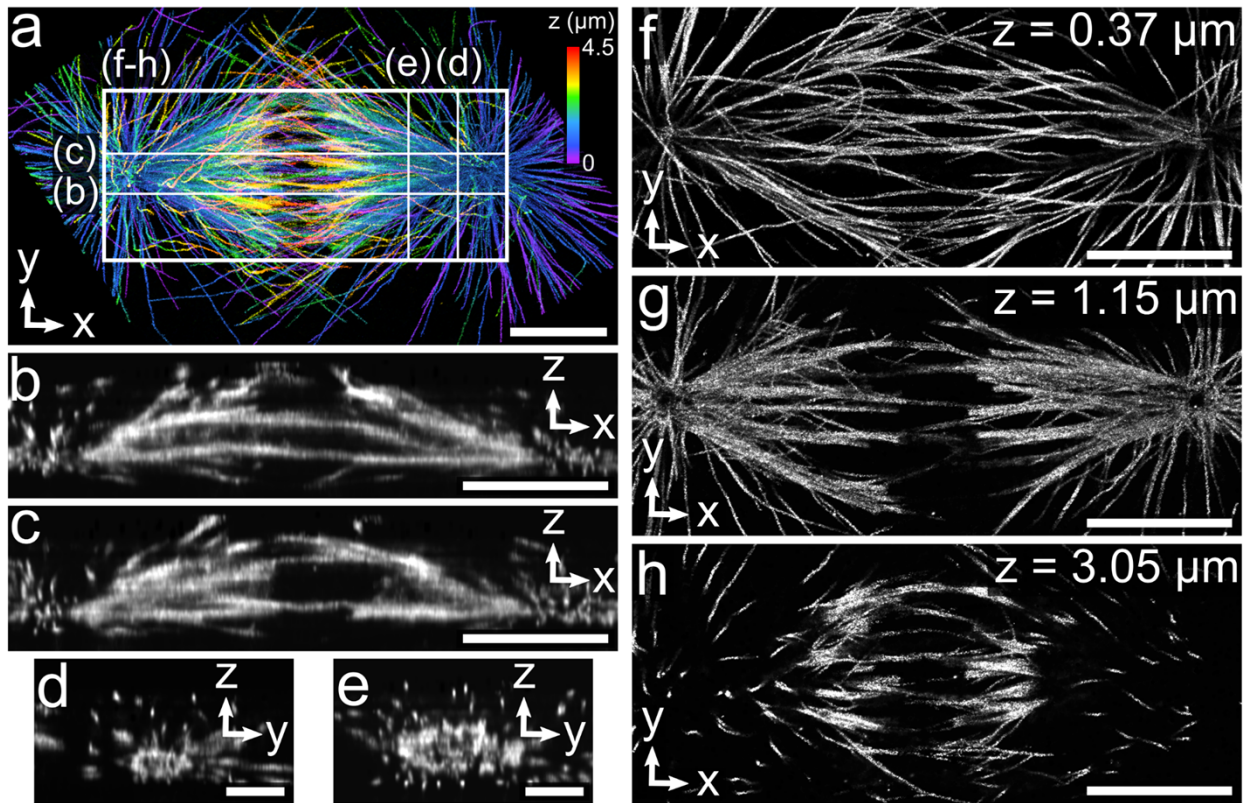

**Figure S4.** Single-molecule localization microscopy of a dividing PTK-1 cell using SDC microscope. (a) Maximum intensity projection of 3D STORM image of immunostained microtubules from a 4.5  $\mu\text{m}$  thick dividing PTK-1 cell with z-dimension position colorized according to the color scale bar. (b-e) Cross-section corresponding to the planes denoted in a. (f) Maximum intensity projection of a 0.75  $\mu\text{m}$  thick image centered at  $z=0.37 \mu\text{m}$  and (g,h) 50 nm thick z-sections corresponding to the z-height denoted in the figure for the area highlighted in a. Scale bars 5  $\mu\text{m}$  (a-c, f-h), 2  $\mu\text{m}$  (d,e).

### Supplemental Note 1: Alignment

The alignment process is analogous to that of an epifluorescence microscope for most steps, however, in this design, the dichroic is placed external to the microscope chassis, and an empty cube is used in microscope turret. Once the microscope is set up for epifluorescence imaging in this way, two unique steps to the SDCM are described as follows. First, the spinning disk pinholes must be carefully placed at the image plane of the microscope. The positions of  $L_4$ ,  $L_5$  and the camera can be set without the disk in the emission path. Next, the disk is inserted near the image plane using white light illumination provided by the microscope condenser. The position of the disk at the image plane is set by carefully sliding it along the optical axis until the stationary pinholes are in sharp focus on the camera to determine the image plane. Observing the pinholes in sharp focus may be facilitated using larger pinholes ( $>50 \mu\text{m}$ ) if available. Second, the iris between  $L_4$  and  $L_5$  can be stopped down to lower background, but not appreciably reduce fluorescence signal. In addition, the spinning disk can then be rotated slightly off perpendicular to the optical axis such that the reflected excitation beam is rejected by the iris. Of final note, we observed that it was best to face the reflective metal side of the spinning disk toward the camera to reduce any autofluorescence background generated by the disk substrate.

### Supplemental Note 2: Spatial Resolution

According to Wilson [3], the lateral diffraction-limited resolution,  $LFWHM_{\text{confocal}}$ , of an idealized confocal microscope with an infinitesimally small pinhole and homogenous pupil illumination can be calculated using the equation below, where  $\lambda$  is the wavelength of light (assuming a small Stokes shift), and  $NA$  is numerical aperture of the objective lens.

$$LFWHM_{confocal} = \frac{0.37\lambda}{NA}$$

For a very large pinhole, which corresponds to that of a widefield microscope, Wilson [3] also provides.

$$LFWHM_{wide} = \frac{0.51\lambda}{NA}$$

Wilson [3] and Amos [4] provide equations for calculation of the axial diffraction-limited spatial resolution for an idealized confocal microscope with an infinitesimal pinhole and very large (widefield) pinholes

$$Z_{FWHM\ confocal} = \frac{0.64\lambda}{n - \sqrt{n^2 - NA^2}}$$

$$Z_{FWHM\ wide} = \frac{0.89\lambda}{n - \sqrt{n^2 - NA^2}}$$

In the case of a finite-sized pinhole, the theoretical lateral and axial diffraction-limited spatial resolution would fall between the respective confocal and widefield diffraction-limited resolutions shown above.

We used a numerical procedure described by Amos [4] and by Sandison [5] that incorporates the pinhole size when calculating theoretical diffraction-limited lateral and axial resolution for a point source, and we show in **Table S5**, below, these theoretical values in comparison with our measured FWHM values. One would expect to see a higher spatial resolution for shorter wavelengths, higher numerical aperture, and higher-index immersion medium; higher spatial resolution is also expected for a smaller pinhole, although this comes with the tradeoff of a significantly reduced signal at very small pinhole values. Although all of our measured resolution values are larger than the theoretical values, we can indeed see that the expected trends are generally observed. It should be noted that the theoretical equations listed above are in the absence of spherical aberration, such as those caused by refractive index mismatch between the immersion medium and the coverglass, that can degrade axial resolution.[6,7] Partial aberration compensation can be accomplished using the methods demonstrated in Supplemental Figure 3.

**Table S5. Comparison of Measured Spatial Resolution and (Predicted) Diffraction-Limited Resolution.**

| $\lambda$ | $NA$ | $D$ | $n$   | Measured |        | Diffraction-Limited |        |
|-----------|------|-----|-------|----------|--------|---------------------|--------|
|           |      |     |       | LFWHM    | AFWHM  | LFWHM               | AFWHM  |
| 405 nm    | 1.45 | 50  | 1.512 | 220 nm   | 960 nm | 143 nm              | 296 nm |
| 488 nm    | 1.45 | 50  | 1.512 | 222 nm   | 490 nm | 173 nm              | 335 nm |
| 561 nm    | 1.45 | 50  | 1.512 | 237 nm   | 500 nm | 197 nm              | 363 nm |
| 647 nm    | 1.45 | 50  | 1.512 | 273 nm   | 560 nm | 221 nm              | 398 nm |
| 750 nm    | 1.45 | 50  | 1.512 | 350 nm   | 610 nm | 245 nm              | 445 nm |
| 488 nm    | 1.27 | 35  | 1.33  | 320 nm   | 770 nm | 197 nm              | 403 nm |
| 561 nm    | 1.27 | 35  | 1.33  | 340 nm   | 740 nm | 226 nm              | 437 nm |
| 647 nm    | 1.27 | 35  | 1.33  | 337 nm   | 720 nm | 262 nm              | 478 nm |
| 488 nm    | 1.45 | 20  | 1.512 | 240 nm   | 400 nm | 139 nm              | 280 nm |
| 488 nm    | 1.45 | 30  | 1.512 | 220 nm   | 420 nm | 155 nm              | 287 nm |
| 488 nm    | 1.45 | 40  | 1.512 | 224 nm   | 450 nm | 169 nm              | 306 nm |

**Abbreviations:**  $NA$  = numerical aperture;  $D$  = pinhole diameter;  $n$  = index of refraction; LFWHM is lateral full-width at half maximum; AFWHM is axial full-width at half maximum.

### Supplemental Note 3: Requirements for Base System

The design for the spinning disk confocal module we presented should be compatible with a range of conventional microscopes. Minimum requirements for the conventional microscope include the following.

- A suitable objective lens (e.g., 100× 1.45 NA oil immersion, 60× 1.27 NA water immersion, or 20× 0.45 NA air lens, as described in Table 1).
- A port for accessing the microscope light path, such as the right-port on our Nikon Ti-U microscope shown in Figure S1. Commercial microscope stands from most major manufacturers include these, including those from Leica, Olympus, Zeiss, as well as other chassis from Nikon.
- There should be a means to axially scan the sample focal plane (e.g., a piezo positioner) and there should be a motorized or manual stage to enable lateral positioning of the sample.
- A camera will be required. Our Hamamatsu Orca v3 sCMOS camera has 6.5 μm square pixels; cameras with pixels of a different size may require a different magnification of the image in the detection path.

A major tradeoff of our simple and inexpensive microlens-free spinning disk confocal microscope design is that the efficiency of excitation light transmitted by the pinhole array is relatively low. For example, as shown in Table 1, disk sector 3 has 50 μm diameter pinholes and a 250 μm spacing, yielding a fill factor of 0.031, or approximately 3.1% transmission of excitation light through the pinhole array. In comparison, commercial microlens spinning disk systems often have transmissions that exceed 50%. This ~16-fold loss in excitation transmission can be compensated by using high-power lasers or by adjusting illumination area or exposure duration. The relatively high-power lasers we used are convenient (at the laser heads, the systems put out maximum powers of 200 mW at 405 nm, 1 W at 488 nm, 2 W at 561 nm, 1.5 W at 647 nm, and 500 mW at 750 nm) but we often used laser powers at the disk in the range 20-200 mW for 266 ms exposures and ~1000 × 1000 pixels areas. We discuss adjustment of the illuminated area in Section 3.4.2, Figure 1a-c, and Figure S1a.

## References

1. A. R. Halpern, M. Y. Lee, M. D. Howard, M. A. Woodward, P. R. Nicovich, and J. C. Vaughan, "Versatile, do-it-yourself, low-cost spinning disk confocal microscope Code 3," <https://osapublishing.figshare.com/s/c5bc145bbb35b4113c93>.
2. A. R. Halpern, M. Y. Lee, M. D. Howard, M. A. Woodward, P. R. Nicovich, and J. C. Vaughan, "Versatile, do-it-yourself, low-cost spinning disk confocal microscope Code 4," <https://osapublishing.figshare.com/s/69563957fe9cb3dfe9b3>.
3. T. Wilson, "Resolution and optical sectioning in the confocal microscope," *Journal of Microscopy* **244**(2), 113–121 (2011).
4. B. Amos, G. McConnell, and T. Wilson, "Confocal Microscopy," in *Comprehensive Biophysics*, 1st ed. (Elsevier, 2012).
5. D. R. Sandison, D. W. Piston, R. M. Williams, and W. W. Webb, "Quantitative comparison of background rejection, signal-to-noise ratio, and resolution in confocal and full-field laser scanning microscopes," *Appl. Opt.* **34**(19), 3576 (1995).
6. C. J. R. Sheppard, M. Gu, K. Brain, and H. Zhou, "Influence of spherical aberration on axial imaging of confocal reflection microscopy," *Appl. Opt.* **33**(4), 616 (1994).
7. S. Hell, G. Reiner, C. Cremer, and E. H. K. Stelzer, "Aberrations in confocal fluorescence microscopy induced by mismatches in refractive index," *Journal of Microscopy* **169**(3), 391–405 (1993).
